# Supplementary material
Source: publisher figshare collection journal article supplement (https://gsapubs.figshare.com/ndownloader/files/22757591)

Data Repository Item

Linda Kirstein -1

**Analytical Methods:** Apatite and zircon separates were prepared from the 100–150  $\mu\text{m}$  fraction of each rock and analysed for fission tracks at Donelick Analytical Inc. The fission track ages presented here are pooled ages with 1-sigma errors (Table DR1). There is no systematic variation in apatite composition, all are F-rich apatite and etch pits are generally of uniform size ( $0.45 \pm 0.05 \mu\text{m}$ ). Where greater than 100 tracks were counted, track length distributions are relatively uniform, with mean track lengths ranging from 13.8 to 14.4  $\mu\text{m}$ , with standard deviations of 1.5–1.9  $\mu\text{m}$  (Table DR1). The sample in which less than 25 tracks were counted yielded a lower mean track length of  $13.2 \pm 1.8 \mu\text{m}$ .

Apatite He age determinations follow the procedure established by Balestrieri et al. (2005). From the apatite separates prepared for fission track analyses, inclusion-free apatites were picked using a binocular microscope for (U-Th)/He age determinations. For each sample between three and nine prismatic grains varying in diameter from 75 to 200  $\mu\text{m}$  were loaded into re-usable stainless steel capsules. A single inclusion-free zircon crystal from sample KHARS 3921 was loaded into a platinum tube and packed into a stainless steel capsule. Each capsule was heated in a resistance furnace at 950°C (apatite) and 1190°C (zircon) for 30 minutes. The remaining zircon samples were packed into Pt tubes and heated using an 808 nm diode laser following established protocols (Foeken et al. in press).  $^4\text{He}$  concentrations were measured relative to a 99.9% pure  $^3\text{He}$  spike in a Hiden HAL3F quadrupole mass spectrometer equipped with an electron multiplier detector at the Scottish Universities Environmental Research Centre. After each measurement samples were reheated to ensure complete degassing. Following analysis sample capsules were retrieved and the apatites dissolved in  $^{235}\text{U}$ - and  $^{230}\text{Th}$ -spiked nitric acid. The retrieved Pt-enclosed zircon was

spiked with  $^{235}\text{U}$  and  $^{230}\text{Th}$  before being dissolved in a Parr<sup>TM</sup> bomb dissolution vessel. The ion exchange column chemistry of Luo et al. (1997) was used to remove the Pt and separate the U and Th. U and Th concentrations were measured on a VG PlasmaQuad 2 ICPMS. Correction for helium recoil loss was made using the procedure of Farley et al. (1996) and Hourigan et al. (2005). Zoning of the apatites was checked using the fission track distribution. The majority of apatites are unzoned or show minor zoning. Analytical uncertainty for each sample is 3–6%.

### *References*

- Balestrieri, M.L., Stuart, F.M., Persano, C., Abbate, E., Bigazzi, G., 2005, Geomorphic development of the escarpment of the Eritrean margin, southern Red Sea: Combined use of fission track and (U-Th)/He Thermochronometry: *Earth and Planetary Science Letters*, v. 231, p. 97-110.
- Farley, K.A., Wolf, R. A., Silver, L. T., 1996, The effects of long alpha-stopping distances on (U-Th)/He ages: *Geochimica et Cosmochimica Acta*, v. 60, p. 4223-4229.
- Foeken, J.H.P., Stuart, F.M., Dobson, K., Persano, C., Vilbert, D. 2006, A diode laser system for heating minerals for (U-Th)/He chronometry. *G<sup>3</sup>* v.7, Q04015, doi:10.1029/2005GC001190.
- Hourigan, J.K., Reiners, P.W., Brandon, M.T., 2005, U-Th zonation-dependent alpha-ejection in (U-Th)/He chronometry: *Geochimica et Cosmochimica Acta*, v. 69, p. 3349-3365.
- Luo, X., Rehkamper, M., Lee, D-C., Halliday, A. N., 1997, High precision  $^{230}\text{Th}/^{232}\text{Th}$  and  $^{234}\text{U}/^{238}\text{U}$  measurements using energy-filtered ICP magnetic sector multiple collector mass spectrometry: *International Journal of Mass Spectrometry*, v.171, p.105-117.

Data Repository Item

Linda Kirstein -2

TABLE DR1. FISSION TRACK ANALYSES FOR THE LADAKH BATHOLITH

| Sample            | $\rho_s$<br>( $10^6$ tracks<br>$\text{cm}^{-2}$ ) | $N_s$<br>(tracks) | $\rho_I$<br>( $10^6$ tracks<br>$\text{cm}^{-2}$ ) | $N_i$<br>(tracks) | $\rho_d$<br>( $10^6$ tracks<br>$\text{cm}^{-2}$ ) | $N_d$<br>(tracks) | Grains    | Dpar<br>( $\mu\text{m}$ ) | Age<br>(Ma)                      | Tracks      | Mean<br>length<br>( $\mu\text{m}$ ) | Standard<br>deviation<br>( $\mu\text{m}$ ) |
|-------------------|---------------------------------------------------|-------------------|---------------------------------------------------|-------------------|---------------------------------------------------|-------------------|-----------|---------------------------|----------------------------------|-------------|-------------------------------------|--------------------------------------------|
| Khars 3921        | 0.257                                             | 61                | 2.401                                             | 570               | 3.602                                             | 4215              | 17        | 1.73                      | $21.9 \pm 3.0$                   | 12          | 13.2                                | 1.9                                        |
| Khars 4110        | 0.324                                             | 157               | 2.779                                             | 1348              | 3.524                                             | 4215              | 22        | 1.85                      | $23.3 \pm 2.1$                   | 125         | 13.9                                | 1.7                                        |
| Khars 4349        | 0.238                                             | 211               | 2.954                                             | 2624              | 3.929                                             | 4025              | 24        | 1.82                      | $18.0 \pm 1.4$                   | 110         | 14.3                                | 1.8                                        |
| Khars 4552        | 0.304                                             | 151               | 2.956                                             | 1468              | 3.505                                             | 4215              | 24        | 1.74                      | $20.5 \pm 1.9$                   | 100         | 13.8                                | 1.8                                        |
| Khars 5132        | 0.401                                             | 296               | 4.493                                             | 3318              | 3.929                                             | 4025              | 23        | 1.85                      | $19.9 \pm 1.3$                   | 110         | 14.4                                | 1.9                                        |
| Khars 5245        | 0.305                                             | 224               | 3.110                                             | 2287              | 3.929                                             | 4025              | 23        | 1.77                      | $21.9 \pm 1.7$                   | 110         | 14.0                                | 1.7                                        |
| <i>Khars 5245</i> | <i>3.499</i>                                      | <i>477</i>        | <i>5.201</i>                                      | <i>709</i>        | <i>0.578</i>                                      | <i>4072</i>       | <i>20</i> | <i>N.A.*</i>              | <i>26.2 <math>\pm</math> 1.8</i> | <i>N.A.</i> | <i>N.A.</i>                         | <i>N.A.</i>                                |

Note: Zircon analysis in italics.

\*N.A. not applicable.

Data Repository Item

Linda Kirstein - 3

TABLE DR2. U, Th, He DATA FROM SELECTED SAMPLES FROM THE LADAKH BATHOLITH

| Sample            |             | Elevation<br>(m) | <sup>238</sup> U<br>(ng) | <sup>232</sup> Th<br>(ng) | <sup>4</sup> He<br>(cc) | No.<br>crystals | He age<br>(Ma) | Ft<br>correction | Corrected<br>He age<br>(Ma) |
|-------------------|-------------|------------------|--------------------------|---------------------------|-------------------------|-----------------|----------------|------------------|-----------------------------|
| Khars 4349        | (i)         | 4349             | 1.43                     | 4.95                      | 3.11E-09                | 9               | 9.9            | 0.76             | 13.0                        |
|                   | (ii)        |                  | 0.26                     | 0.88                      | 5.51E-10                | 4               | 9.6            | 0.64             | 14.9                        |
| Khars 5132        | (i)         | 5132             | 1.27                     | 3.19                      | 2.62E-09                | 5               | 10.6           | 0.79             | 13.4                        |
|                   | (ii)        |                  | 0.24                     | 0.48                      | 3.28E-10                | 3               | 7.7            | 0.63             | 12.2                        |
| Khars 5245        | (i)         | 5245             | 0.97                     | 2.30                      | 2.83E-09                | 6               | 15.5           | 0.67             | 20.7                        |
|                   | (ii)        |                  | 0.39                     | 0.76                      | 7.32E-10                | 5               | 10.4           | 0.67             | 15.5                        |
| <i>Khars 3921</i> | <i>(i)</i>  | <i>3921</i>      | <i>3.42</i>              | <i>3.81</i>               | <i>6.65E-09</i>         | <i>1</i>        | <i>12.8</i>    | <i>0.62</i>      | <i>20.7</i>                 |
|                   | <i>(ii)</i> |                  | <i>8.81</i>              | <i>11.07</i>              | <i>1.54E-08</i>         | <i>5</i>        | <i>11.2</i>    | <i>0.48</i>      | <i>23.4</i>                 |
| <i>Khars 4552</i> | <i>(i)</i>  | <i>4552</i>      | <i>5.75</i>              | <i>4.05</i>               | <i>1.23E-08</i>         | <i>3</i>        | <i>15.3</i>    | <i>0.79</i>      | <i>19.3</i>                 |
|                   | <i>(ii)</i> |                  | <i>3.31</i>              | <i>1.51</i>               | <i>6.60E-09</i>         | <i>4</i>        | <i>15.3</i>    | <i>0.74</i>      | <i>20.7</i>                 |
| <i>Khars 5245</i> | <i>(i)</i>  | <i>5245</i>      | <i>3.29</i>              | <i>4.11</i>               | <i>8.24E-09</i>         | <i>5</i>        | <i>16.4</i>    | <i>0.67</i>      | <i>24.3</i>                 |
|                   | <i>(ii)</i> |                  |                          |                           |                         |                 |                |                  |                             |

Note: Zircon He data in italics.

Data Repository Item

Linda Kirstein - 4

TABLE DR3. LOCATION OF LADAKH SAMPLES.

| Sample     | Longitude<br>(°E) | Latitude<br>(°N) |
|------------|-------------------|------------------|
| Khars 3921 | 77.611            | 34.202           |
| Khars 4110 | 77.619            | 34.212           |
| Khars 4349 | 77.616            | 34.226           |
| Khars 4552 | 77.617            | 34.241           |
| Khars 5132 | 77.622            | 34.269           |
| Khars 5245 | 77.605            | 34.279           |

Figure DR1. Model solutions from (a) Markov Chain Monte Carlo approach (Gallagher et al., 2005). Log likelihood for the constant offset (15  $\mu\text{m}$ ) model is -2714.329 (11 parameters) and is favoured by the Bayesian Information Criterion. Rapid cooling in the Early Miocene is evident. (b) Best fit solutions for AFTSolve modeling, again rapid cooling in the Early Miocene is apparent.

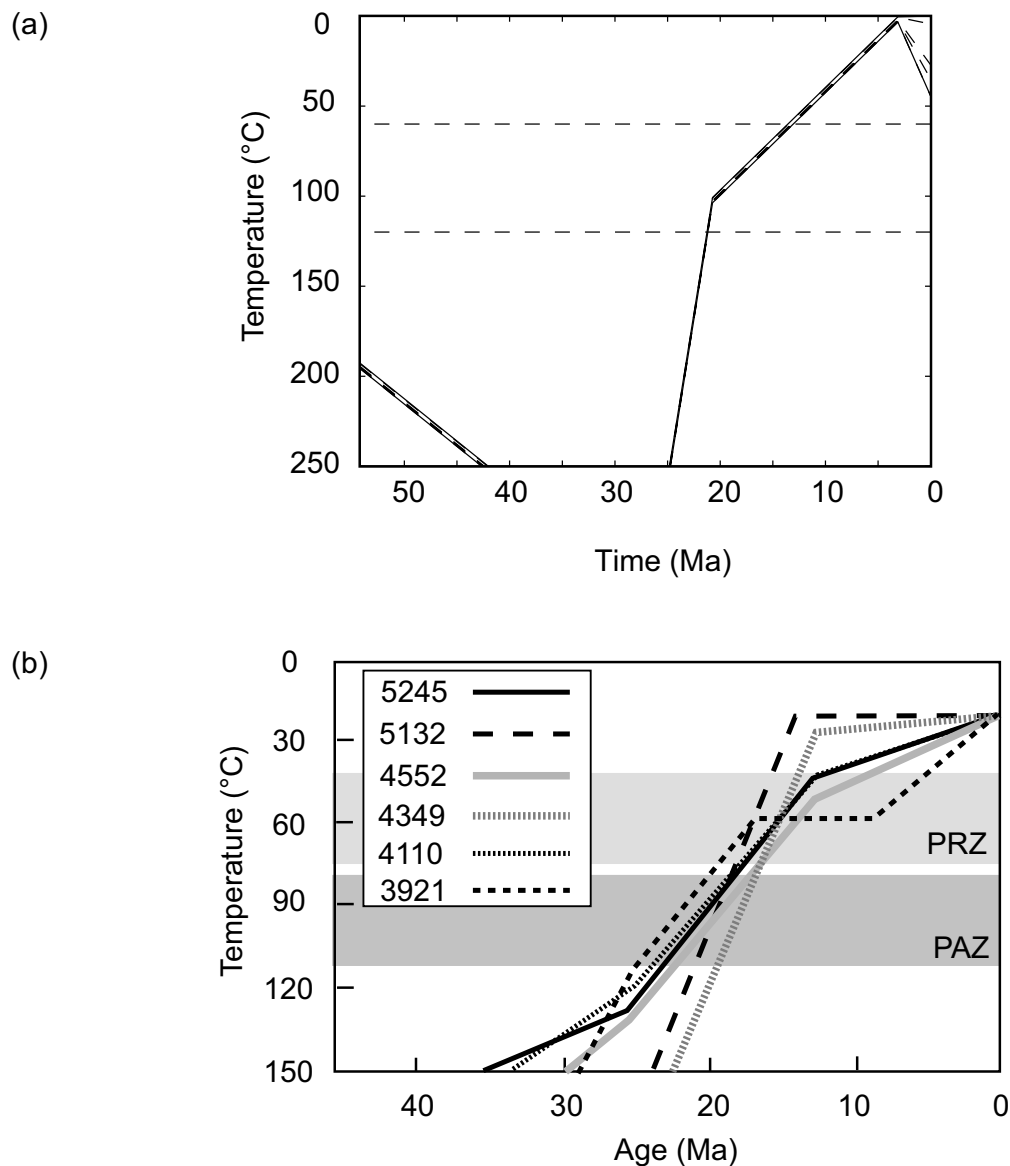

Supplement: Supplementary file 1 [file 22757591]
